# Supplementary material for: Improving the stability and reusability of dextranase by immobilization on polyethylenimine modified magnetic particles
Source: Royal Society of Chemistry journal article supplement (doi:10.1039/c8nj00227d), 2018-01-01
Supplement: c8nj00227d1.pdf [file c8nj00227d1.pdf]

## Supporting Information

### Improving the stability and reusability of dextranase by immobilization on polyethylenimine modified magnetic particles

Yajie Wang\*, Qiang Wang, Xiaoping Song, and Jingjing Cai

Department of Pharmacy, Anhui Medical College  
Hefei, 230601, Anhui, P. R. China,  
E-mail: cactus0926@hotmail.com  
Fax: +086-551-63818357; Tel: +86-551-63818357

#### Figure and table contents

**Fig. S1** (a) SEM and (b) TEM images of  $\text{Fe}_3\text{O}_4@\text{SiO}_2$  particles.

**Fig. S2** Effects of initial concentration of dextranase on the loading capacities of  $\text{Fe}_3\text{O}_4@\text{SiO}_2\text{-NH}_2$  and  $\text{Fe}_3\text{O}_4@\text{SiO}_2\text{-PEI}$  particles without GA modified.

**Fig. S3** Effects of initial concentration of dextranase on the immobilization efficiencies of  $\text{Fe}_3\text{O}_4@\text{SiO}_2\text{-NH}_2$  and  $\text{Fe}_3\text{O}_4@\text{SiO}_2\text{-PEI}$  particles without GA modified.

**Fig. S4** Effects of initial concentration of dextranase on the immobilization efficiencies and relative enzyme activities of  $\text{Fe}_3\text{O}_4@\text{SiO}_2\text{-NH}_2\text{-dextranase}$  particles.

**Fig. S5** Effects of reaction time on the immobilization efficiencies and relative enzyme activities of  $\text{Fe}_3\text{O}_4@\text{SiO}_2\text{-NH}_2\text{-dextranase}$  particles.

**Table S1** Elemental analysis result of two kinds of magnetic particles

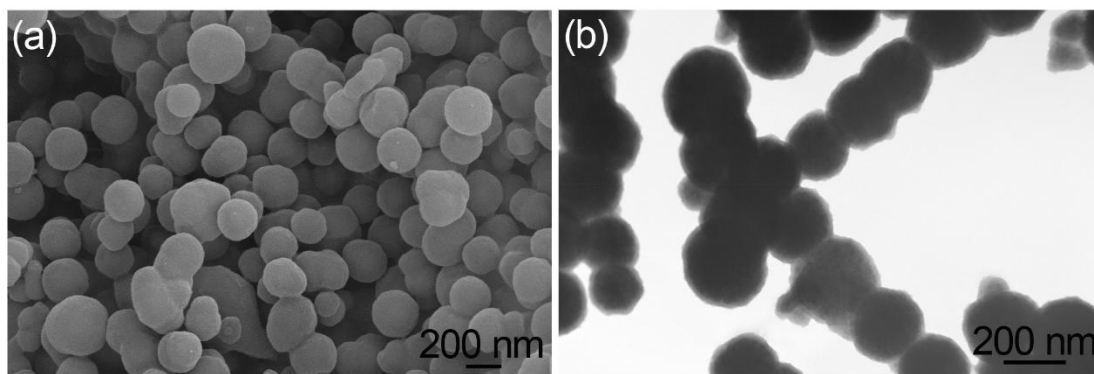

**Fig. S1** (a) SEM and (b) TEM images of  $\text{Fe}_3\text{O}_4@\text{SiO}_2$  particles

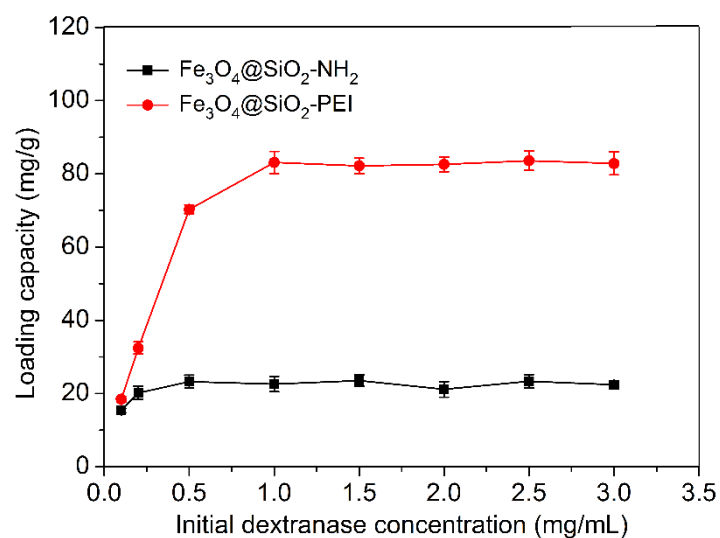

**Fig. S2** Effects of initial concentration of dextranase on the loading capacities of  $\text{Fe}_3\text{O}_4@\text{SiO}_2\text{-NH}_2$  and  $\text{Fe}_3\text{O}_4@\text{SiO}_2\text{-PEI}$  particles without GA modified.

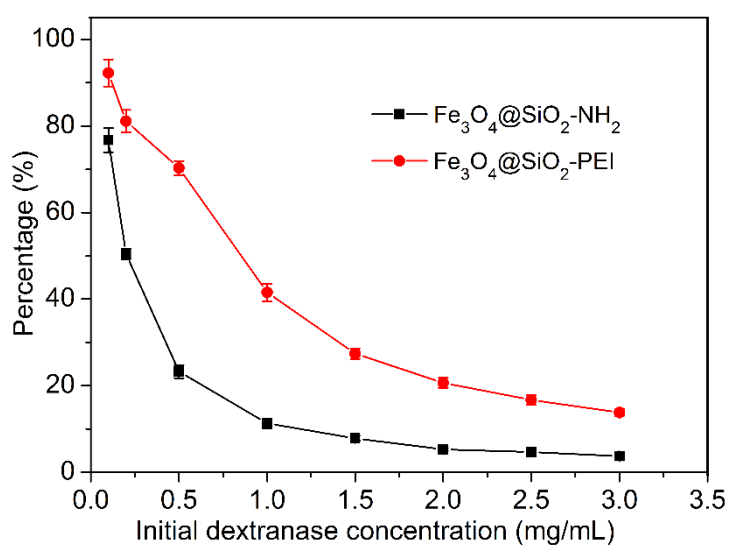

**Fig. S3** Effects of initial concentration of dextranase on the immobilization efficiencies of  $\text{Fe}_3\text{O}_4@\text{SiO}_2\text{-NH}_2$  and  $\text{Fe}_3\text{O}_4@\text{SiO}_2\text{-PEI}$  particles without GA modified.

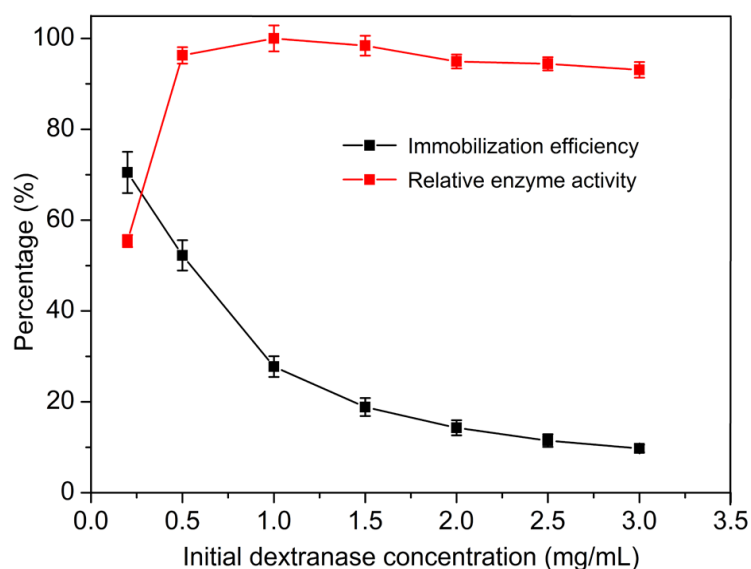

**Fig. S4** Effects of initial concentration of dextranase on the immobilization efficiencies and relative enzyme activities of  $\text{Fe}_3\text{O}_4@\text{SiO}_2\text{-NH}_2$ -dextranase particles.

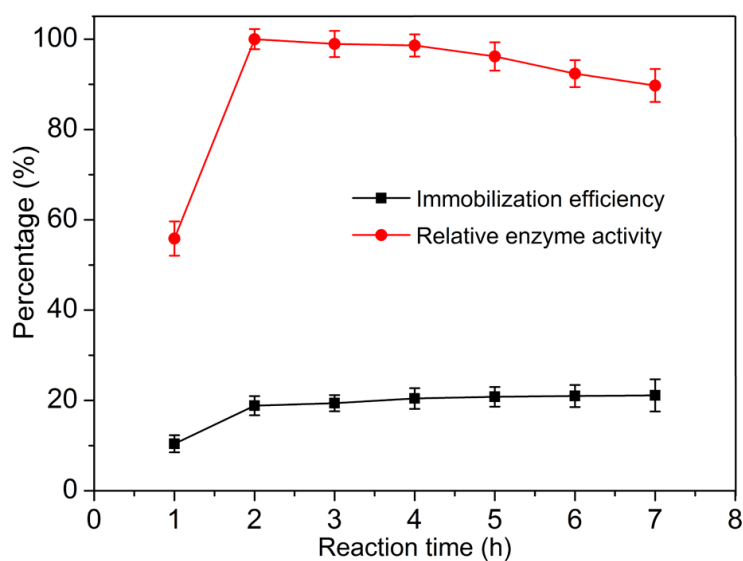

**Fig. S5** Effects of reaction time on the immobilization efficiencies and relative enzyme activities of  $\text{Fe}_3\text{O}_4@\text{SiO}_2\text{-NH}_2$ -dextranase particles.

**Table S1** Elemental analysis result of two kinds of magnetic particles

| Magnetic particles                               | C %  | H %  | N %  |
|--------------------------------------------------|------|------|------|
| $\text{Fe}_3\text{O}_4@\text{SiO}_2\text{-NH}_2$ | 2.81 | 1.12 | <0.3 |
| $\text{Fe}_3\text{O}_4@\text{SiO}_2\text{-PEI}$  | 8.12 | 1.92 | 2.48 |
